# Supplementary material for: Single-molecule long-read sequencing reveals a conserved intact long RNA profile in sperm
Source: PubMed Central journal article supplement (PMC7921563; doi:10.1038/s41467-021-21524-6), 2021-03-01
Supplement: 41467_2021_21524_MOESM1_ESM.pdf [file 41467_2021_21524_MOESM1_ESM.pdf]

# Supplementary Information

## Single-molecule long-read sequencing reveals a conserved intact long RNA profile in sperm

Yu H. Sun, Anqi Wang, Chi Song, Goutham Shankar, Rajesh K. Srivastava,

Kin Fai Au, Xin Zhiguo Li

Correspondence:

kinfai.au@osumc.edu (K.F.A.) & Xin\_Li@URMC.rochester.edu (X.Z.L.)

### **This PDF file includes:**

Supplementary Figs. 1-5

Supplementary Table 1

Supplementary Table 2

Supplementary Table 3

## Supplementary Figures

**a**

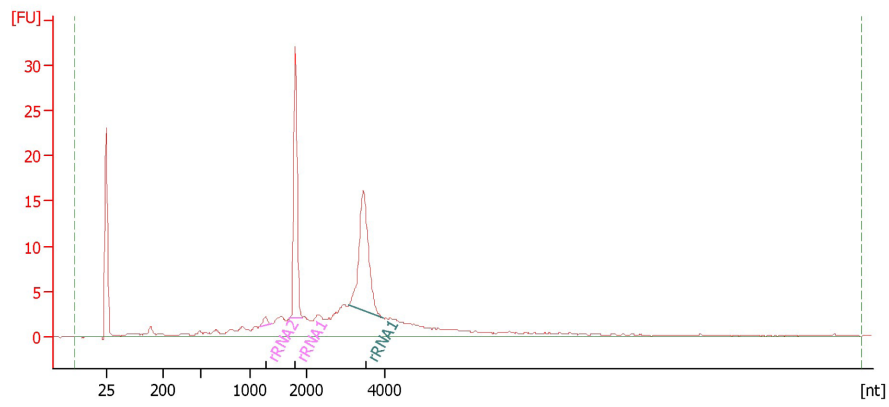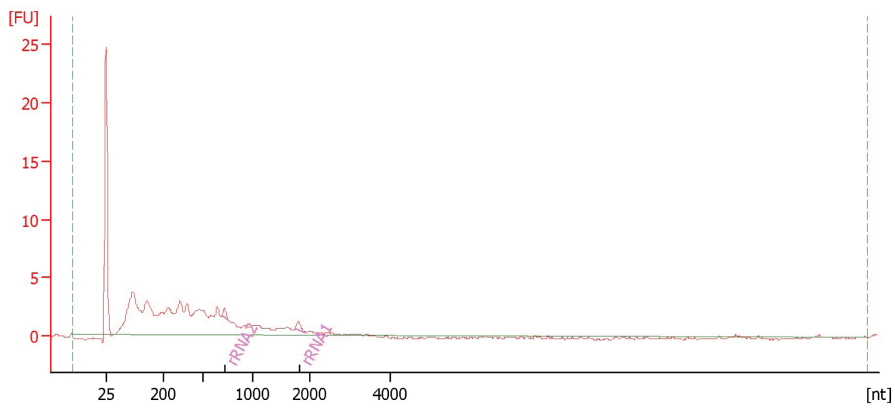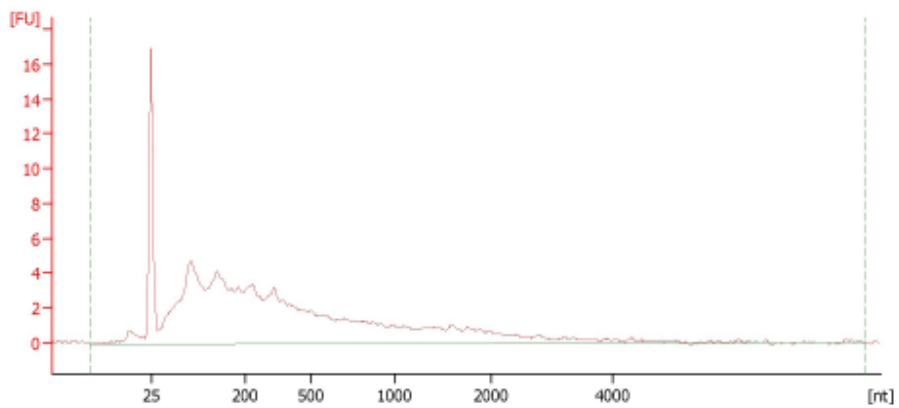

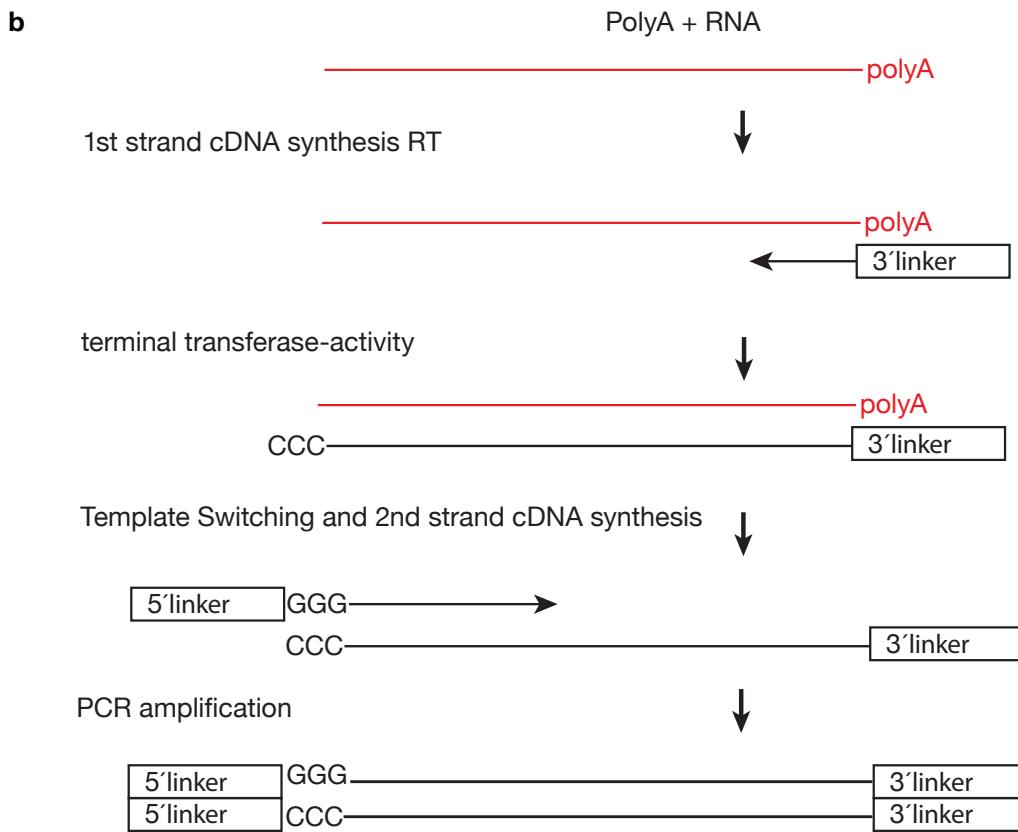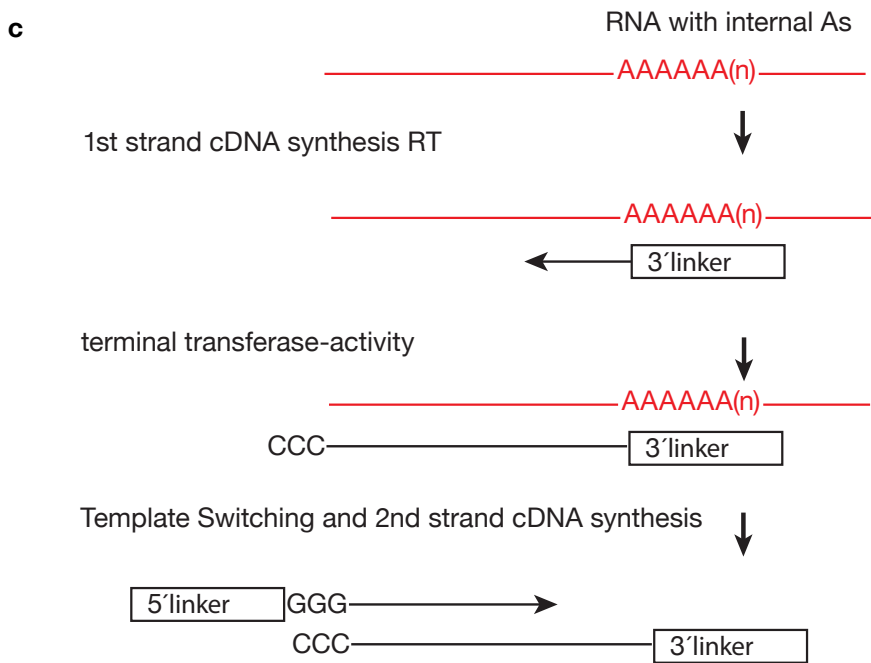

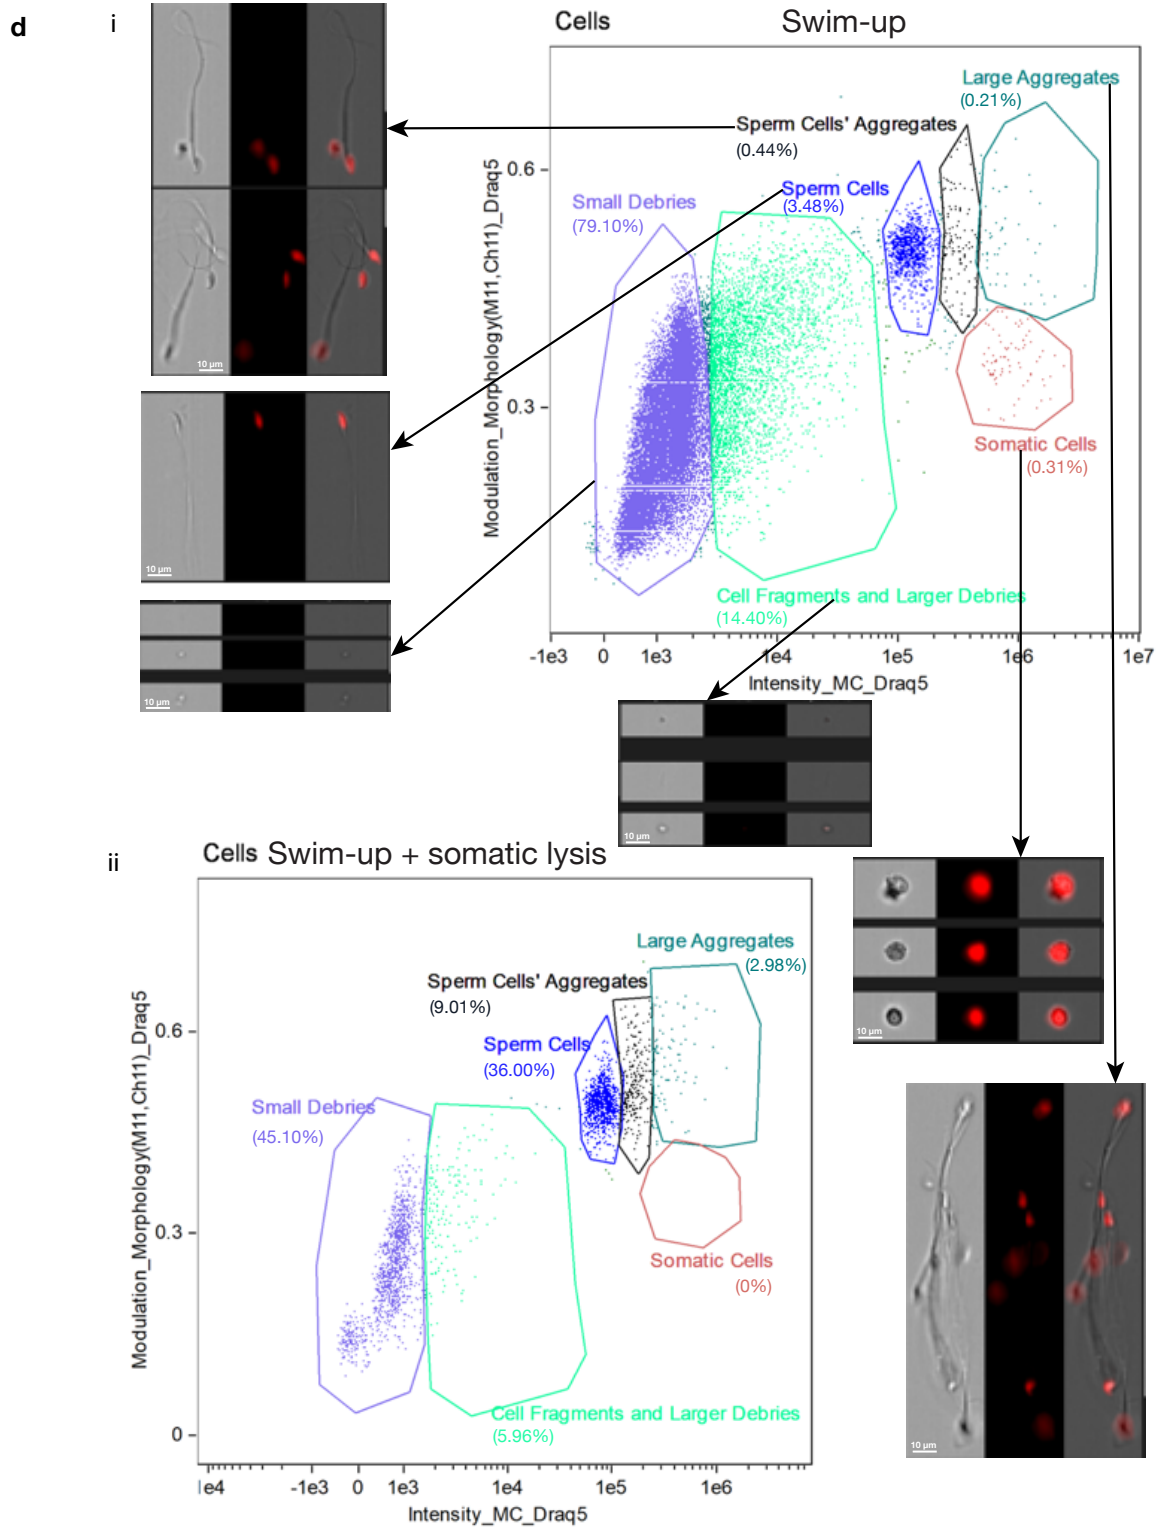

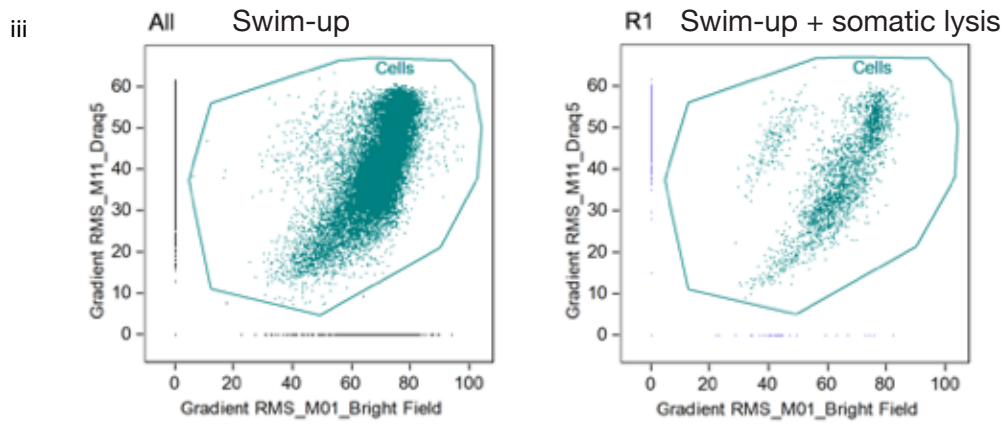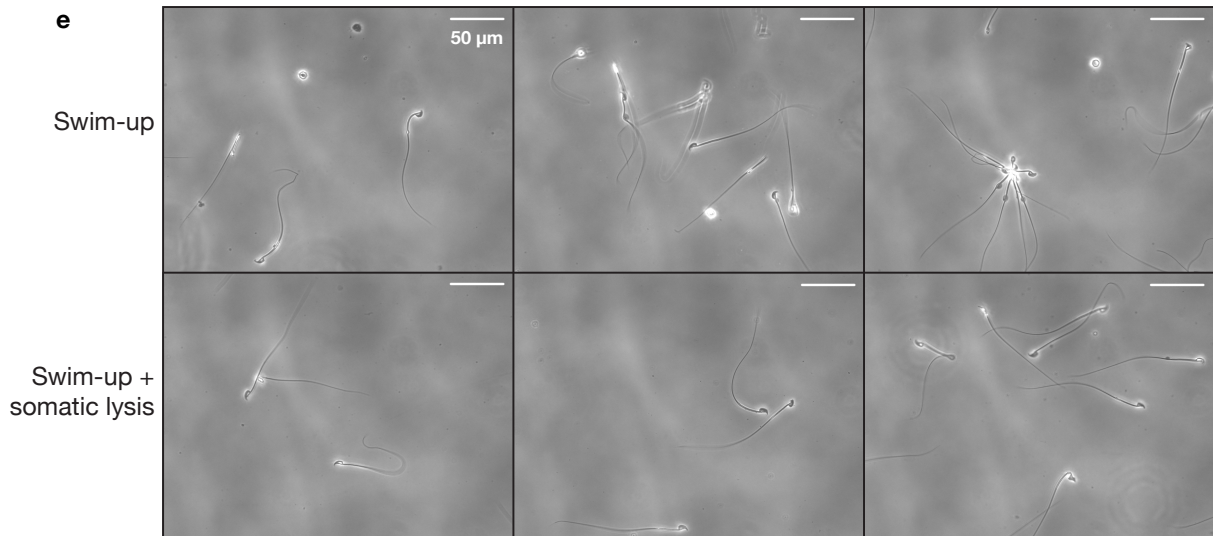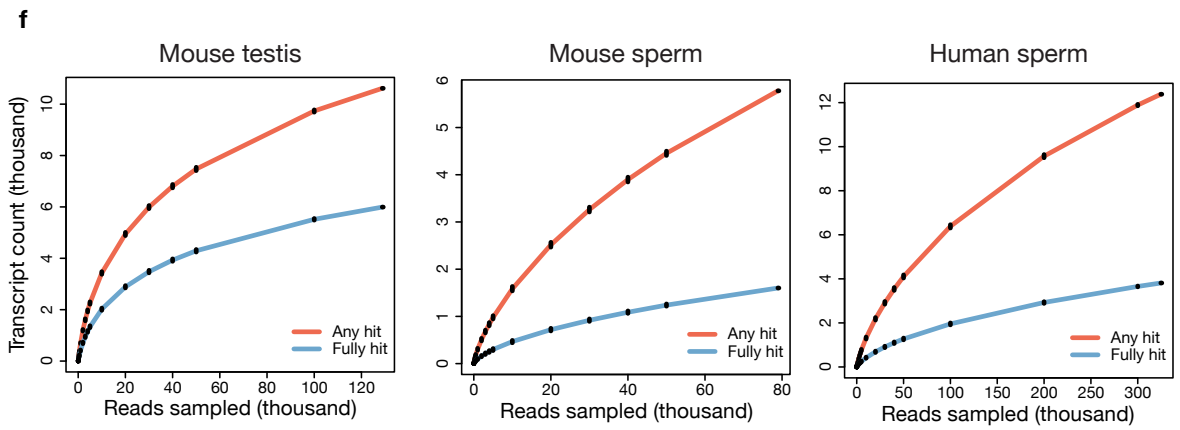

**Supplementary Fig. 1. Defining intact transcripts in mouse sperm.** a) Bioanalyzer profiles of mouse testis, mouse sperm, and human sperm. FU: fluorescence units. b) Iso-Seq library construction strategy. c) Potential artifacts that occur during Iso-Seq library construction due to internal priming. d) Flow cytometry analysis of mouse sperm released from cauda epididymis before (upper, i) and after the somatic lysis purification procedure (lower, ii). To analyze the data obtained from ImageStream, first most out of focus images were excluded by plotting events' Gradient RMS for bright field channel versus Gradient RMS for Draq5 channel (iii, The Gradient RMS feature measures the sharpness quality of an image by detecting large changes of pixel values in the image). Experiments were repeated at least three times independently with similar results. e) Microscopy analysis of mouse sperm released from cauda epididymis before (upper) and after the somatic lysis purification procedure (lower). Experiments were repeated at least three times independently with similar results. f) Transcript detection of long-read sequencing from mouse testis, mouse sperm, and human sperm. Rarefaction plot shows the number of transcripts detected (*y*-axis) as more reads were added to the analysis (*x*-axis). Different numbers of reads were randomly sampled from the successfully aligned reads, and the number of transcripts was calculated from the sampled reads. The black bar at each read count represents the range of detected transcripts from multiple sampling tests; the solid lines concatenate medians. The blue solid line represents the full-length matched transcripts only; red solid line represents transcripts detected with any match (full-length or partial). The fewer transcripts detected per increased number of reads sampled (i.e., the more the line flattens), the closer the analysis is to achieving complete detection (100% sensitivity). Source data of Supplementary Fig. 1e are provided as a Source Data file.

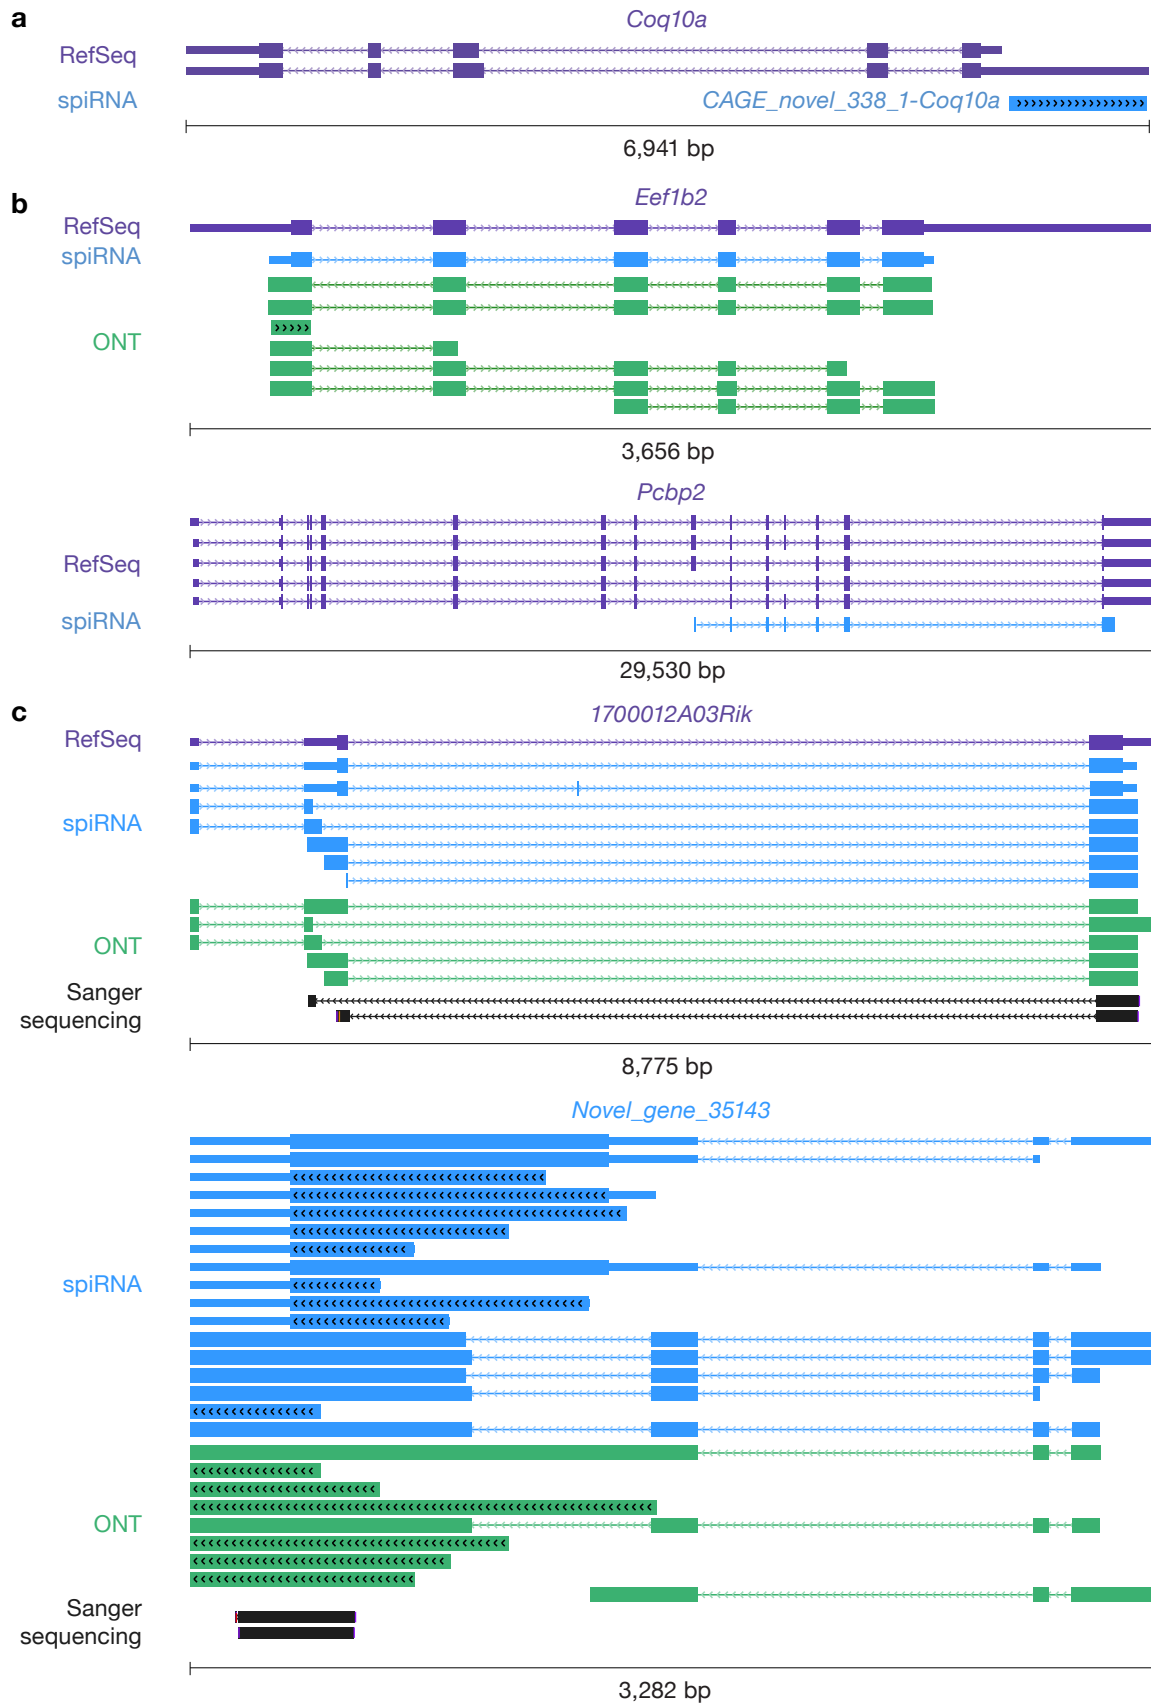

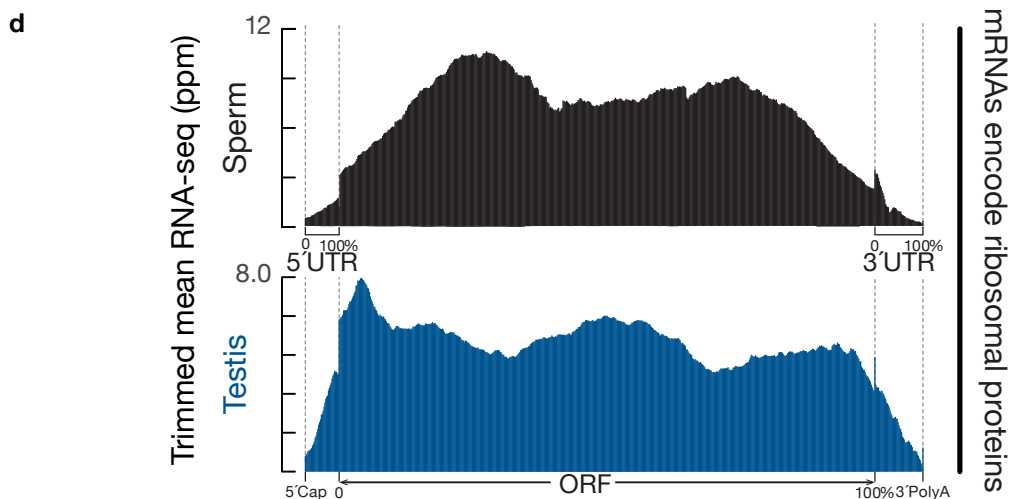

**Supplementary Fig. 2. Intact transcripts found in mouse sperm.** a) An example of a novel transcript that is antisense to a known gene locus. From top to bottom, RefSeq, and spiRNA. b) Two examples of novel transcript structures from known genes, *Eef1b2* and *Pcbp2*. From top to bottom, RefSeq and spiRNA. c) A novel isoform from *1700012A03Rik* Gene (upper) and a novel transcript from an intergenic region were confirmed by Sanger sequencing and ONT (Oxford Nanopore Technologies) sequencing. From top to bottom, RefSeq, spiRNAs, ONT sequencing reads, and the Sanger sequencing reads. d) Aggregated data for RNA-seq abundance on ribosomal protein-encoding mRNAs from sperm (*top*), and from testis (*bottom*) across 5'UTRs, ORFs, and 3'-UTRs. The x-axis represents the median length of these regions, and the y-axis represents the 10% trimmed mean of relative abundance. Ppm, parts per million.



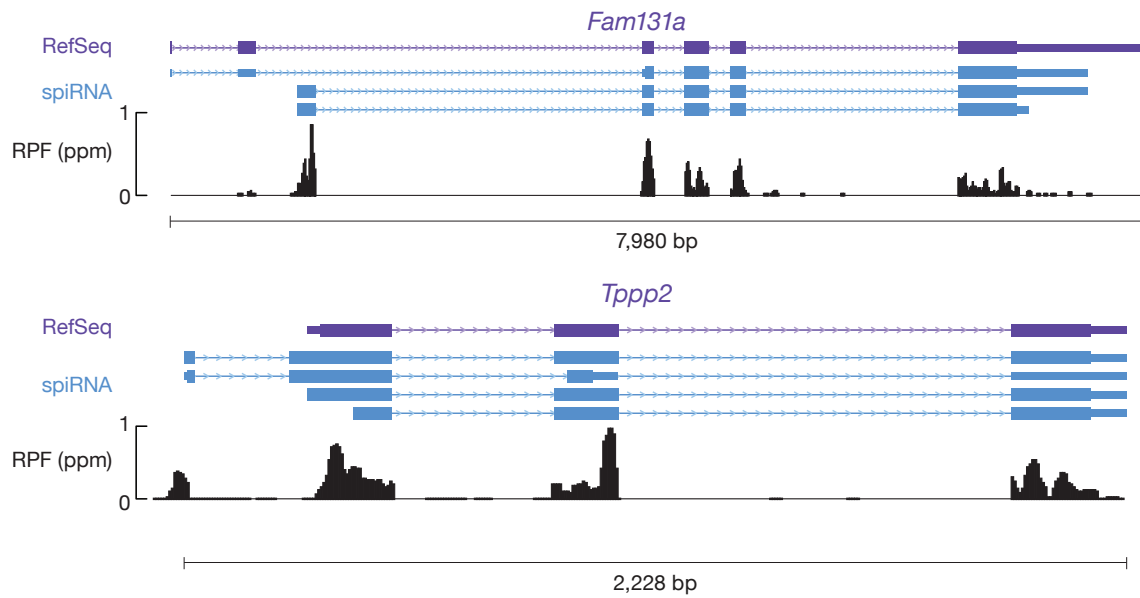

**Supplementary Fig. 3. Novel spiRNAs are translated during spermatogenesis.** Two examples of novel spiRNA transcript structures with altered coding regions in comparison to RefSeq annotation. From top to bottom, RefSeq, spiRNA, and RPF (ribosome protected fragment) reads.

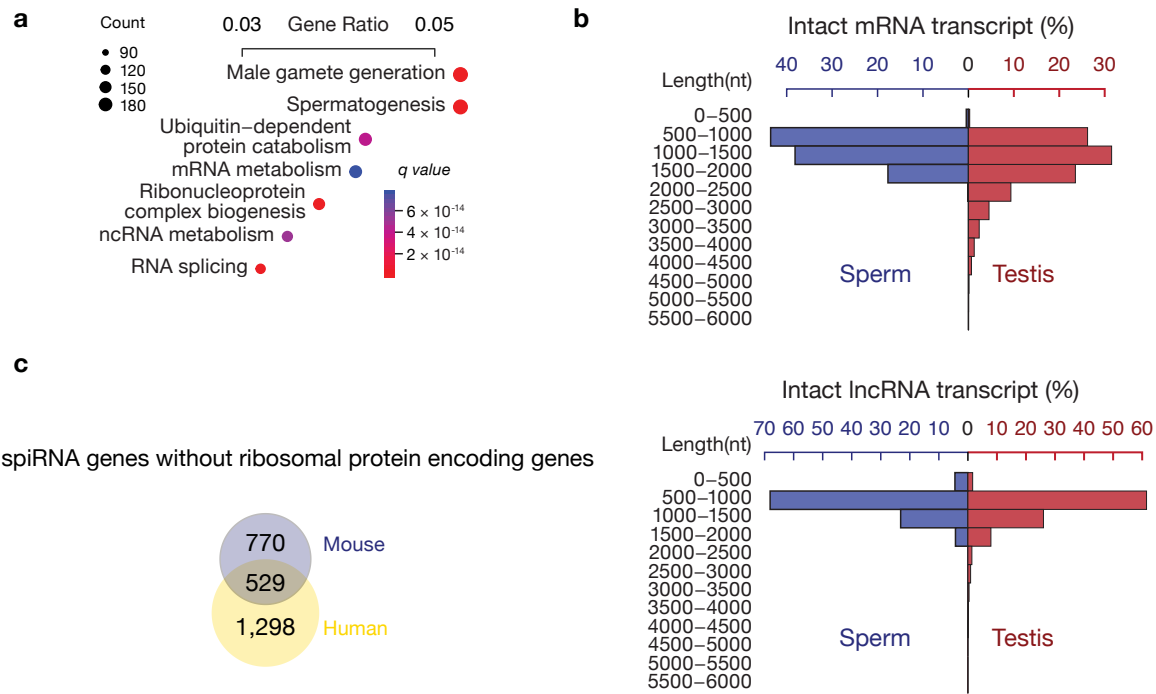

**Supplementary Fig. 4. Conserved spiRNA profiles.** a) GO-term enrichment analysis for biological pathway of testicular intact RNA genes. One-sided hypergeometric test was used to determine the  $p$  value.  $q$  value, adjusted  $p$  value using benjamini-hochberg correction. The plot displays the top 7 pathways by gene ratio (number of genes related to GO term / total number of genes associated with a GO term in mouse genome). b) Histogram showing transcript lengths of mRNAs (*top*) and lncRNAs (*bottom*). Blue, spiRNAs. Red, intact testicular long RNAs. c) Venn diagrams showing the overlapping gene loci of spiRNAs from mice and humans that exclude the mRNAs encoding ribosomal proteins. Source data of Supplementary Fig. 4b are provided as a Source Data file.

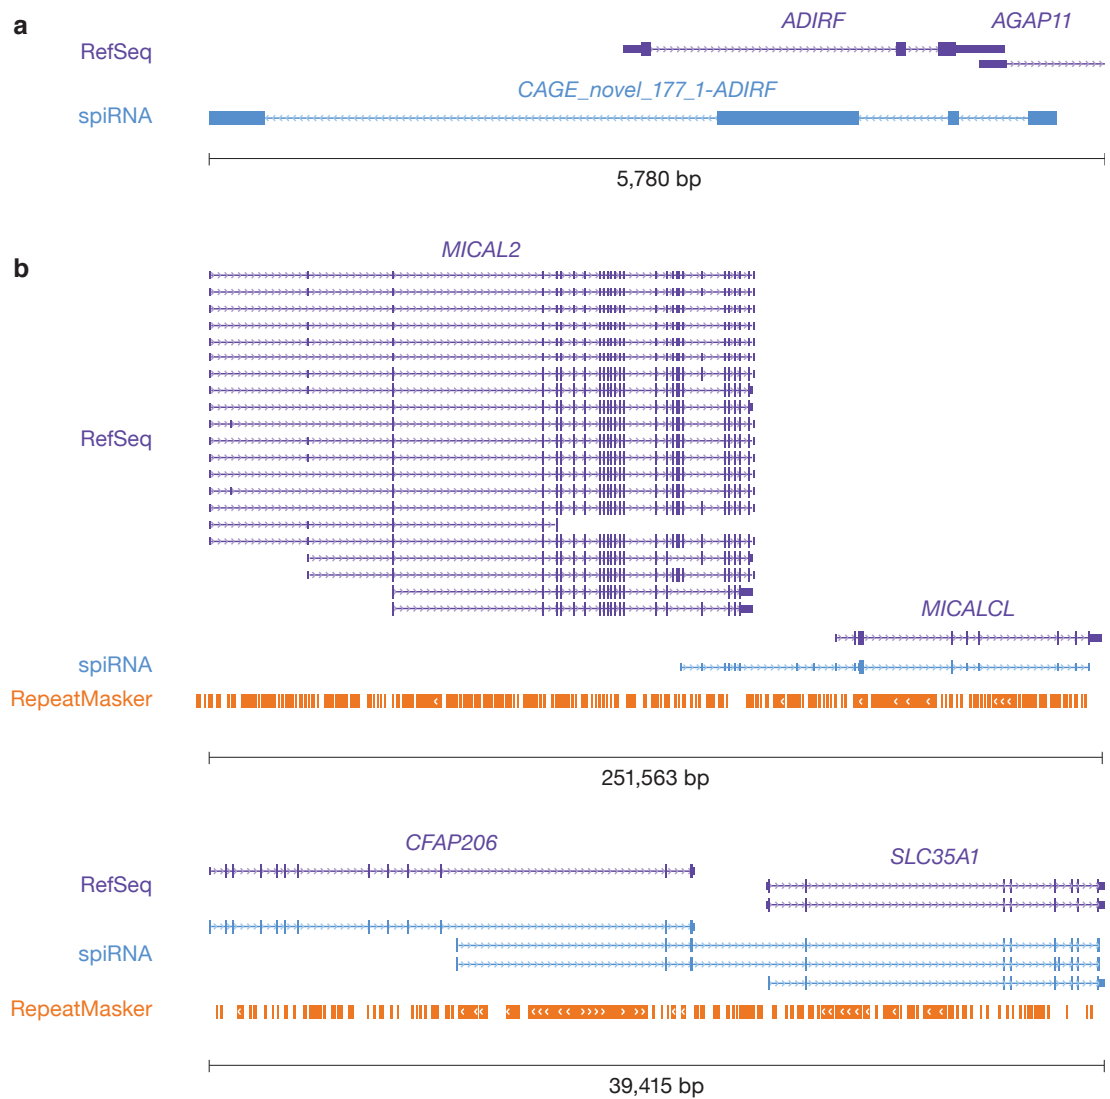

**Supplementary Fig. 5. Novel intact transcripts in human sperm.** a) An example of a novel transcript that is antisense to a known gene locus. From top to bottom, RefSeq and spiRNA. b) Two spiRNAs span neighboring annotated genes. From top to bottom, RefSeq, spiRNA and RepeatMasker.

**Supplementary Table 1. Statistics of flow cytometry results**

| Gated cell types                 | Swim-up method |         | Swim-up + somatic lysis method |         |
|----------------------------------|----------------|---------|--------------------------------|---------|
|                                  | Count          | % Gated | Count                          | % Gated |
| Sperm Cells                      | 870            | 3.48    | 943                            | 36.00   |
| Small Debris                     | 19,781         | 79.10   | 1,182                          | 45.10   |
| Cell Fragments and Larger Debris | 3,598          | 14.40   | 156                            | 5.96    |
| Sperm Cells' Aggregates          | 111            | 0.44    | 236                            | 9.01    |
| Large Aggregates                 | 52             | 0.21    | 78                             | 2.98    |
| Somatic Cells                    | 78             | 0.31    | 0                              | 0       |

## Supplementary Table 2. Mouse sperm purity quantification

| Template                 | qPCR quantification of <i>Myh11</i> |
|--------------------------|-------------------------------------|
| Epididymis cDNA          | $1.26 \times 10^{-2}$               |
| 1/10 Epididymis cDNA     | $5.79 \times 10^{-3}$               |
| 1/100 Epididymis cDNA    | $6.80 \times 10^{-4}$               |
| 1/1,000 Epididymis cDNA  | $3.85 \times 10^{-5}$               |
| 1/10,000 Epididymis cDNA | Not detected                        |
| Purified sperm cDNA      | Not detected                        |

### Supplementary Table 3. PCR primers

F: Forward primer, R: Reverse primer

| Detects                  | Species | Primer id | F/R | Sequences                                     |
|--------------------------|---------|-----------|-----|-----------------------------------------------|
| <i>Rps6</i> T7 Template  | mouse   | 17.0105   | F   | CGTAATACGACTCACTATAGGGCTCGGCTGTGTCAAGATGAA    |
|                          |         | 17.0106   | R   | TAGAAGCTCTCAGTGAGGACAG                        |
| <i>Rps6</i> qPCR         | mouse   | 17.0092   | F   | AAGAAGATGATGTCCGCCAG                          |
|                          |         | 17.0093   | R   | CAAGTCGCTGAATCTTGGGT                          |
| <i>Rps8</i> T7 Template  | mouse   | 20.0009   | F   | CGTAATACGACTCACTATAGGGCCTACCACAAGAAGCGAAAGTA  |
|                          |         | 20.0010   | R   | CCTTTCCGGGCTTTGATCTT                          |
| <i>Rps8</i> qPCR         | mouse   | 20.0019   | F   | CGAGTTCGAGGAGGCAATAAG                         |
|                          |         | 20.0020   | R   | CGTTGTTGGATGCATTGTAGAC                        |
| <i>Rpl11</i> T7 Template | mouse   | 20.0011   | F   | CGTAATACGACTCACTATAGGGCGGTGTTCTCCAAAGCTAGATAC |
|                          |         | 20.0012   | R   | CTACCCAGCACCACATAGAAG                         |
| <i>Rpl11</i> qPCR        | mouse   | 20.0015   | F   | CTGAAGGTGCGGGAGTATG                           |
|                          |         | 20.0016   | R   | CCAATGCTTGGGTCGTATTTG                         |
| <i>Myh11</i> qPCR        | mouse   | 15.0350   | F   | CTCTCCATCCGGTGTCTC                            |
|                          |         | 15.0351   | R   | TTCTCATCATCGCTGAGCTG                          |
